# Supplementary material
Source: PubMed Central journal article supplement (PMC10387965)
Supplement: jmcp.2023.29.1.80_s001.pdf [file jmcp.2023.29.1.80_s001.pdf]

## **SUPPLEMENTARY MATERIALS**

### **Descriptive study of the economic burden among patients with type 2 diabetes, chronic kidney disease, and chronic kidney disease and type 2 diabetes in a large US commercially insured population**

Haechung Chung, MPH; Christopher L Crowe, MPH; Sheldon X Kong, PhD; Rakesh Singh, PhD; Ryan Farej, BS; Jay Elliott, PhD; Todd Williamson, PhD; Vincent J Willey, PharmD

**SUPPLEMENTARY FIGURE 1** Study Design Diagram

**SUPPLEMENTARY TABLE 1** Diagnosis and Procedure Codes for Patient Selection

**SUPPLEMENTARY TABLE 2** 12-Month Post-Index Health Care Resource Utilization

## Supplemental Figure 1. Study Design Diagram

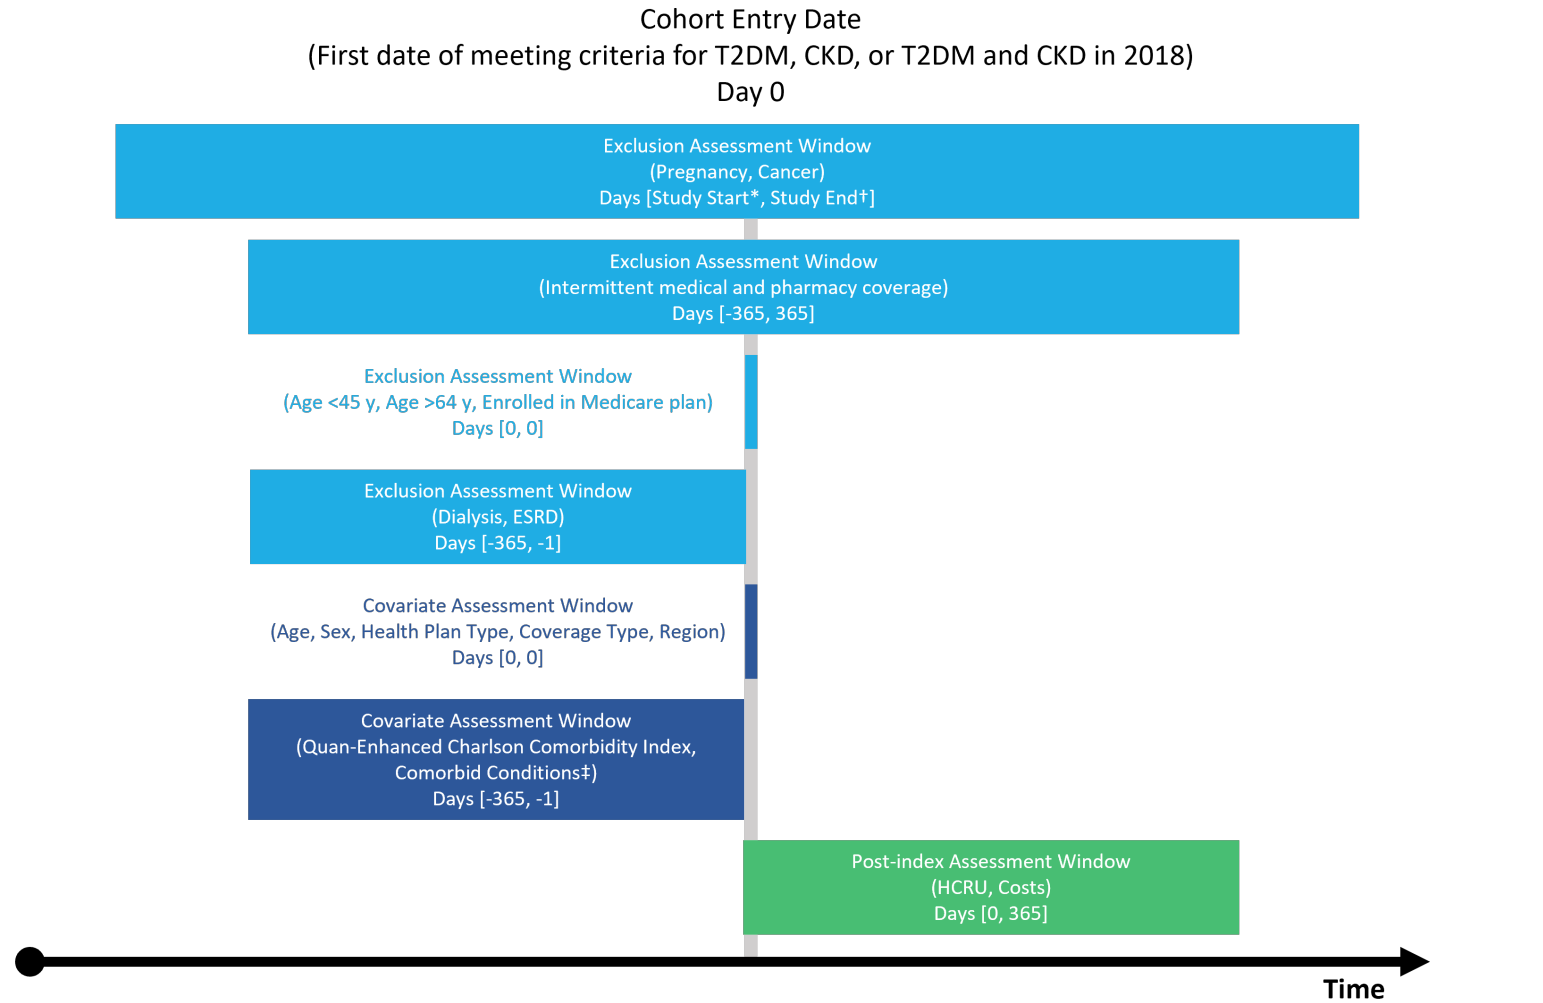

T2DM = Type 2 diabetes mellitus; CKD = Chronic kidney disease; ESRD = End-stage renal disease; HCRU = Health care resource utilization

\* Study Start: January 1, 2017

† Study End = December 31, 2019

‡ Comorbid Conditions = Coronary artery disease, heart failure, hypertension, peripheral vascular disease, depression, dyslipidemia, obesity, diabetic neuropathy, chronic obstructive pulmonary disease, sleep apnea

**Supplemental Table 1. Diagnosis and procedure codes for patient selection**

| Condition                                                         | ICD-9 code                                                                                                                                                                                                                                                         | ICD-10 code                                                                                                                                                                                                                                                                                                                                                                        | CPT code | HCPCS code |
|-------------------------------------------------------------------|--------------------------------------------------------------------------------------------------------------------------------------------------------------------------------------------------------------------------------------------------------------------|------------------------------------------------------------------------------------------------------------------------------------------------------------------------------------------------------------------------------------------------------------------------------------------------------------------------------------------------------------------------------------|----------|------------|
| Cancer                                                            |                                                                                                                                                                                                                                                                    | C00.% - C96.% excluding C44.%1%                                                                                                                                                                                                                                                                                                                                                    |          |            |
| Chronic<br>Kidney<br>Disease                                      | 403, 403.1, 403.9,<br>404, 404.01, 404.1,<br>404.11, 404.9,<br>404.91, 581, 581.1,<br>581.2, 581.3, 581.81,<br>581.89, 581.9, 582,<br>582.1, 582.2, 582.4,<br>582.8, 582.81,<br>582.89, 582.9, 585,<br>585.1, 585.2, 585.3,<br>585.4, 585.9, 587,<br>274.1, 274.19 | I12.9, I13.0, I13.10, N02.2, N04.0,<br>N04.3, N04.4, N04.8, N04.9, N08,<br>N18.1, N18.2, N18.3, N18.4, N18.9,<br>N25.89, R80.9, D63.1, M10.30,<br>M10.311, M10.312, M10.319,<br>M10.321, M10.322, M10.329,<br>M10.331, M10.332, M10.339,<br>M10.341, M10.342, M10.349,<br>M10.351, M10.352, M10.359,<br>M10.361, M10.362, M10.369,<br>M10.371, M10.372, M10.379,<br>M10.38, M10.39 |          |            |
| Chronic<br>Kidney<br>Disease in<br>Type 2<br>Diabetes<br>Mellitus |                                                                                                                                                                                                                                                                    | E08.22, E11.22, E08.21, E08.29,<br>E11.21, E11.29, E13.21, E13.22,<br>E13.29                                                                                                                                                                                                                                                                                                       |          |            |

|                            |       |                                                                                                                                                                                                                                                                                                                      |                                                                                                                                               |
|----------------------------|-------|----------------------------------------------------------------------------------------------------------------------------------------------------------------------------------------------------------------------------------------------------------------------------------------------------------------------|-----------------------------------------------------------------------------------------------------------------------------------------------|
| Dialysis                   | Z99.2 | 3066F, 36147,<br>36148, 36800,<br>36810, 36815,<br>4052F, 4053F,<br>4054F, 4055F,<br>90935, 90937,<br>90940, 90945,<br>90947, 90951,<br>90952, 90953,<br>90954, 90955,<br>90956, 90957,<br>90958, 90959,<br>90960, 90961,<br>90962, 90963,<br>90964, 90965,<br>90966, 90967,<br>90968, 90969,<br>90970, 99512, 0507F | G8714, G8715,<br>G8716, G8717,<br>G8718, G8720,<br>S9339, S9335,<br>G8075, G8076,<br>G8077, G8078,<br>G8079, G8080,<br>G8081, G8082,<br>G8085 |
| End Stage<br>Renal Disease |       | I12.0, I13.11, I13.2, N18.6, N18.5                                                                                                                                                                                                                                                                                   |                                                                                                                                               |
| Insulin Pump               |       | Z46.81                                                                                                                                                                                                                                                                                                               | E0784, J1817                                                                                                                                  |

|                                |  |                                                         |  |  |
|--------------------------------|--|---------------------------------------------------------|--|--|
| Kidney<br>Transplantation      |  | Z94.0, T86.1, T86.10, T86.11,<br>T86.12, T86.13, T86.19 |  |  |
| Pregnancy                      |  | O00.% - O9A.%                                           |  |  |
| Type 1<br>Diabetes<br>Mellitus |  | E10.%                                                   |  |  |

|                                         |                                                                                                                                                                            |                                                                                                                                                                                                                                                                                                                                                                                                                                                                                                                                                                                                                                                                                                                                                                      |  |  |
|-----------------------------------------|----------------------------------------------------------------------------------------------------------------------------------------------------------------------------|----------------------------------------------------------------------------------------------------------------------------------------------------------------------------------------------------------------------------------------------------------------------------------------------------------------------------------------------------------------------------------------------------------------------------------------------------------------------------------------------------------------------------------------------------------------------------------------------------------------------------------------------------------------------------------------------------------------------------------------------------------------------|--|--|
| <p>Type 2<br/>Diabetes<br/>Mellitus</p> | <p>250, 250.02, 250.1,<br/>250.12, 250.2,<br/>250.22, 250.3,<br/>250.32, 250.5,<br/>250.52, 250.6,<br/>250.62, 250.7,<br/>250.72, 250.8,<br/>250.82, 250.9,<br/>250.92</p> | <p>E11.0, E11.00, E11.01, E11.1,<br/>E11.10, E11.11, E11.3, E11.31,<br/>E11.311, E11.319, E11.32, E11.321,<br/>E11.3211, E11.3212, E11.3213,<br/>E11.3219, E11.329, E11.3291,<br/>E11.3292, E11.3293, E11.3299,<br/>E11.33, E11.331, E11.3311,<br/>E11.3312, E11.3313, E11.3319,<br/>E11.339, E11.3391, E11.3392,<br/>E11.3393, E11.3399, E11.34,<br/>E11.341, E11.3411, E11.3412,<br/>E11.3413, E11.3419, E11.349,<br/>E11.3491, E11.3492, E11.3493,<br/>E11.3499, E11.35, E11.351,<br/>E11.3511, E11.3512, E11.3513,<br/>E11.3519, E11.352, E11.3521,<br/>E11.3522, E11.3523, E11.3529,<br/>E11.353, E33.3531, E33.3523,<br/>E33.3533, E33.3539, E11.354,<br/>E11.3541, E11.3542, E11.3543,<br/>E11.3549, E11.355, E11.3551,<br/>E11.3552, E11.3553, E11.3559,</p> |  |  |
|-----------------------------------------|----------------------------------------------------------------------------------------------------------------------------------------------------------------------------|----------------------------------------------------------------------------------------------------------------------------------------------------------------------------------------------------------------------------------------------------------------------------------------------------------------------------------------------------------------------------------------------------------------------------------------------------------------------------------------------------------------------------------------------------------------------------------------------------------------------------------------------------------------------------------------------------------------------------------------------------------------------|--|--|

|  |  |                                                                                                                                                                                                                                                                                                                                                                                                       |  |  |
|--|--|-------------------------------------------------------------------------------------------------------------------------------------------------------------------------------------------------------------------------------------------------------------------------------------------------------------------------------------------------------------------------------------------------------|--|--|
|  |  | E11.359, E11.3591, E11.3592,<br>E11.3593, E11.3599, E11.36,<br>E11.37, E11.37X1, E11.37X2,<br>E11.37X3, E11.37X9, E11.39,<br>E11.4, E11.40, E11.41, E11.42,<br>E11.43, E11.44, E11.49, E11.5,<br>E11.51, E11.52, E11.59, E11.6,<br>E11.61, E11.610, E11.618, E11.62,<br>E11.620, E11.621, E11.622,<br>E11.628, E11.63, E11.630, E11.638,<br>E11.64, E11.641, E11.649, E11.65,<br>E11.69, E11.8, E11.9 |  |  |
|--|--|-------------------------------------------------------------------------------------------------------------------------------------------------------------------------------------------------------------------------------------------------------------------------------------------------------------------------------------------------------------------------------------------------------|--|--|

**Supplemental Table 2. 12-Month Post-index Health Care Resource Utilization**

|                                        | <b>T2DM only<br/>(n=120,364)</b> |        | <b>CKD only<br/>(n=7,876)</b> |        | <b>CKD and T2DM<br/>(n=13,052)</b> |        |
|----------------------------------------|----------------------------------|--------|-------------------------------|--------|------------------------------------|--------|
| <b>All-Cause</b>                       |                                  |        |                               |        |                                    |        |
| <b>Inpatient Hospitalization</b>       |                                  |        |                               |        |                                    |        |
| ≥ 1 visit, n (%)                       | 10,230                           | 8.5%   | 1,048                         | 13.3%  | 2,533                              | 19.4%  |
| Number of visits, mean (SD)            | 0.1                              | 0.4    | 0.2                           | 0.7    | 0.3                                | 0.9    |
| <b>Emergency Room Visits</b>           |                                  |        |                               |        |                                    |        |
| ≥ 1 visit, n (%)                       | 22,429                           | 18.6%  | 1,497                         | 19.0%  | 3,171                              | 24.3%  |
| Number of visits, mean (SD)            | 0.3                              | 0.7    | 0.3                           | 0.9    | 0.4                                | 1.0    |
| <b>Outpatient Encounters</b>           |                                  |        |                               |        |                                    |        |
| ≥ 1 visit, n (%)                       | 120,314                          | 100.0% | 7,876                         | 100.0% | 13,052                             | 100.0% |
| Number of encounters, mean (SD)        | 19.9                             | 18.8   | 27.0                          | 27.6   | 32.1                               | 32.3   |
| <b>Physician Office Visits</b>         |                                  |        |                               |        |                                    |        |
| ≥ 1 visit, n (%)                       | 119,572                          | 99.3%  | 7,855                         | 99.7%  | 13,027                             | 99.8%  |
| Number of visits, mean (SD)            | 7.5                              | 5.8    | 9.3                           | 7.4    | 10.9                               | 8.2    |
| <b>Durable Medical Equipment</b>       |                                  |        |                               |        |                                    |        |
| ≥ 1 visit, n (%)                       | 26,444                           | 22.0%  | 1,816                         | 23.1%  | 4,435                              | 34.0%  |
| Number of visits, mean (SD)            | 0.9                              | 3.4    | 1.1                           | 4.2    | 2.0                                | 6.3    |
| <b>Imaging</b>                         |                                  |        |                               |        |                                    |        |
| ≥ 1 visit, n (%)                       | 57,966                           | 48.2%  | 5,029                         | 63.9%  | 8,140                              | 62.4%  |
| Number of visits, mean (SD)            | 1.6                              | 2.6    | 2.5                           | 3.2    | 2.6                                | 3.5    |
| <b>Medication and Related Services</b> |                                  |        |                               |        |                                    |        |
| ≥ 1 visit, n (%)                       | 68,672                           | 57.1%  | 4,734                         | 60.1%  | 8,746                              | 67.0%  |
| Number of visits, mean (SD)            | 1.4                              | 3.1    | 2.0                           | 7.5    | 2.6                                | 7.2    |
| <b>Physician Other Services</b>        |                                  |        |                               |        |                                    |        |
| ≥ 1 visit, n (%)                       | 56,383                           | 46.8%  | 3,172                         | 40.3%  | 7,620                              | 58.4%  |
| Number of visits, mean (SD)            | 1.5                              | 4.8    | 1.9                           | 6.3    | 2.3                                | 5.4    |
| <b>Procedures</b>                      |                                  |        |                               |        |                                    |        |
| ≥ 1 visit, n (%)                       | 56,750                           | 47.1%  | 4,291                         | 54.5%  | 7,493                              | 57.4%  |



|                                                      |         |       |       |       |        |       |
|------------------------------------------------------|---------|-------|-------|-------|--------|-------|
| Number of visits, mean (SD)                          | 1.8     | 4.1   | 2.8   | 11.5  | 3.9    | 13.0  |
| <b>Physiotherapy/Occupational<br/>Therapy/Speech</b> |         |       |       |       |        |       |
| ≥ 1 visit, n (%)                                     | 20,004  | 16.6% | 1,590 | 20.2% | 2,697  | 20.7% |
| Number of visits, mean (SD)                          | 1.8     | 6.3   | 2.4   | 7.1   | 2.6    | 7.7   |
| <b>Tests (Lab)</b>                                   |         |       |       |       |        |       |
| ≥ 1 visit, n (%)                                     | 117,454 | 97.6% | 7,760 | 98.5% | 12,936 | 99.1% |
| Number of visits, mean (SD)                          | 5.8     | 4.5   | 7.7   | 7.2   | 9.1    | 7.9   |
| <b>Tests (Other)</b>                                 |         |       |       |       |        |       |
| ≥ 1 visit, n (%)                                     | 50,362  | 41.8% | 3,603 | 45.7% | 7,210  | 55.2% |
| Number of visits, mean (SD)                          | 1.0     | 1.9   | 1.3   | 2.4   | 1.8    | 3.0   |
| <b>Other</b>                                         |         |       |       |       |        |       |
| ≥ 1 visit, n (%)                                     | 76,940  | 63.9% | 5,521 | 70.1% | 9,211  | 70.6% |
| Number of visits, mean (SD)                          | 2.8     | 5.4   | 3.5   | 6.1   | 4.0    | 8.5   |
| <b>Prescription Use</b>                              |         |       |       |       |        |       |
| ≥ 1 prescription fills, n (%)                        | 117,242 | 97.4% | 7,593 | 96.4% | 12,740 | 97.6% |
| Number of prescription fills,<br>mean (SD)           | 24.1    | 16.6  | 21.9  | 16.9  | 32.2   | 20.3  |
| <b>Disease-specific (CKD or T2DM)</b>                |         |       |       |       |        |       |
| <b>Inpatient Hospitalization</b>                     |         |       |       |       |        |       |
| ≥ 1 visit, n (%)                                     | 2,050   | 1.7%  | 209   | 2.7%  | 1,027  | 7.9%  |
| Number of visits, mean (SD)                          | 0.0     | 0.2   | 0.0   | 0.2   | 0.1    | 0.5   |
| <b>Emergency Room Visits</b>                         |         |       |       |       |        |       |
| ≥ 1 visit, n (%)                                     | 1,549   | 1.3%  | 64    | 0.8%  | 401    | 3.1%  |
| Number of visits, mean (SD)                          | 0.0     | 0.1   | 0.0   | 0.1   | 0.0    | 0.2   |
| <b>Outpatient Encounters</b>                         |         |       |       |       |        |       |
| ≥ 1 visit, n (%)                                     | 119,822 | 99.5% | 7,831 | 99.4% | 13,033 | 99.9% |
| Number of encounters, mean<br>(SD)                   | 7.0     | 5.9   | 6.2   | 6.8   | 12.7   | 13.9  |
| <b>Physician Office Visits</b>                       |         |       |       |       |        |       |
| ≥ 1 visit, n (%)                                     | 114,341 | 95.0% | 7,284 | 92.5% | 12,813 | 98.2% |

|                                                      |         |       |       |       |        |       |
|------------------------------------------------------|---------|-------|-------|-------|--------|-------|
| Number of visits, mean (SD)                          | 3.6     | 2.6   | 2.9   | 2.2   | 5.7    | 4.3   |
| <b>Durable Medical Equipment</b>                     |         |       |       |       |        |       |
| ≥ 1 visit, n (%)                                     | 7,181   | 6.0%  | 277   | 3.5%  | 1,600  | 12.3% |
| Number of visits, mean (SD)                          | 0.1     | 1.0   | 0.1   | 1.3   | 0.4    | 2.5   |
| <b>Imaging</b>                                       |         |       |       |       |        |       |
| ≥ 1 visit, n (%)                                     | 12,636  | 10.5% | 1,580 | 20.1% | 3,124  | 23.9% |
| Number of visits, mean (SD)                          | 0.1     | 0.5   | 0.3   | 0.8   | 0.4    | 0.9   |
| <b>Medication and Related Services</b>               |         |       |       |       |        |       |
| ≥ 1 visit, n (%)                                     | 43,858  | 36.4% | 1,932 | 24.5% | 6,075  | 46.5% |
| Number of visits, mean (SD)                          | 0.6     | 1.3   | 0.5   | 3.0   | 1.2    | 3.7   |
| <b>Physician Other Services</b>                      |         |       |       |       |        |       |
| ≥ 1 visit, n (%)                                     | 38,771  | 32.2% | 786   | 10.0% | 5,477  | 42.0% |
| Number of visits, mean (SD)                          | 0.5     | 1.1   | 0.2   | 0.8   | 1.0    | 2.4   |
| <b>Procedures</b>                                    |         |       |       |       |        |       |
| ≥ 1 visit, n (%)                                     | 24,479  | 20.3% | 988   | 12.5% | 4,060  | 31.1% |
| Number of visits, mean (SD)                          | 0.5     | 2.1   | 0.4   | 4.1   | 1.4    | 6.1   |
| <b>Physiotherapy/Occupational<br/>Therapy/Speech</b> |         |       |       |       |        |       |
| ≥ 1 visit, n (%)                                     | 2,055   | 1.7%  | 149   | 1.9%  | 586    | 4.5%  |
| Number of visits, mean (SD)                          | 0.1     | 1.4   | 0.1   | 1.3   | 0.4    | 2.7   |
| <b>Tests (Lab)</b>                                   |         |       |       |       |        |       |
| ≥ 1 visit, n (%)                                     | 111,786 | 92.9% | 6,872 | 87.3% | 12,613 | 96.6% |
| Number of visits, mean (SD)                          | 3.5     | 2.6   | 2.9   | 3.0   | 5.3    | 4.2   |
| <b>Tests (Other)</b>                                 |         |       |       |       |        |       |
| ≥ 1 visit, n (%)                                     | 27,442  | 22.8% | 1,059 | 13.4% | 4,308  | 33.0% |
| Number of visits, mean (SD)                          | 0.4     | 0.9   | 0.2   | 0.6   | 0.7    | 1.6   |
| <b>Other</b>                                         |         |       |       |       |        |       |
| ≥ 1 visit, n (%)                                     | 32,325  | 26.9% | 1,607 | 20.4% | 4,757  | 36.4% |
| Number of visits, mean (SD)                          | 0.6     | 2.2   | 0.4   | 1.8   | 1.3    | 4.9   |

*CDHP: Consumer Driven Health Products; CKD: Chronic Kidney Disease; HMO: Health*

*Maintenance Organization; PPO: Provider Preferred Organization; T2DM: Type 2 Diabetes Mellitus*
